# Supplementary material for: Plasmonic biochips with enhanced stability in harsh environments for the sensitive detection of prostate-specific antigen
Source: Royal Society of Chemistry journal article supplement (doi:10.1039/d3tb02303f), 2024-01-01
Supplement: d3tb02303f1.pdf [file d3tb02303f1.pdf]

## Supporting Information

### **Plasmonic Biochips with Enhanced Stability in Harsh Environments for the Sensitive Detection of Prostate-Specific Antigen**

I-Hsiu Yeh<sup>†</sup>, Hui-Fang Shi<sup>†</sup>, Evan Darius<sup>†</sup>, Mei-Chin Lien<sup>†</sup>, Yin-Cheng Lu<sup>†</sup>, Congzhou  
Wang<sup>‡§</sup>, and Keng-Ku Liu<sup>+\*</sup>

<sup>†</sup>: Department of Biomedical Engineering and Environmental Sciences, National Tsing  
Hua University, Hsinchu 300044, Taiwan

<sup>‡</sup>: Nanoscience and Biomedical Engineering, South Dakota School of Mines and  
Technology, Rapid City, South Dakota 57701, USA

<sup>§</sup>: BioSystems Networks & Translational Research (BioSNTR), Rapid City, South Dakota  
57701, USA

\*To whom correspondence should be addressed: [kkliu@mx.nthu.edu.tw](mailto:kkliu@mx.nthu.edu.tw)

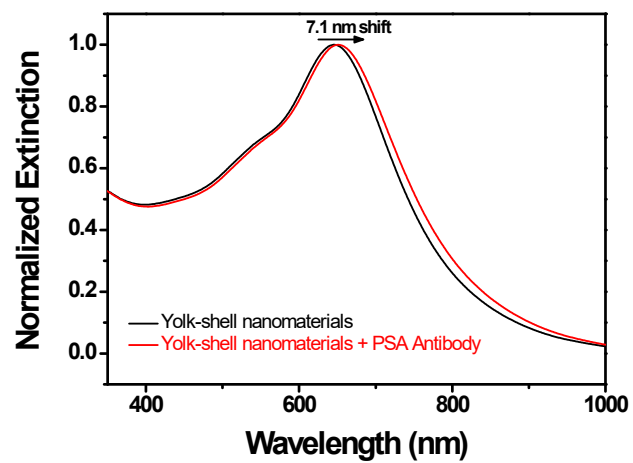

**Fig. S1** Representative UV-Vis spectrum showing the LSPR shift after conjugation of yolk-shell nanomaterials with PSA antibody in solution.

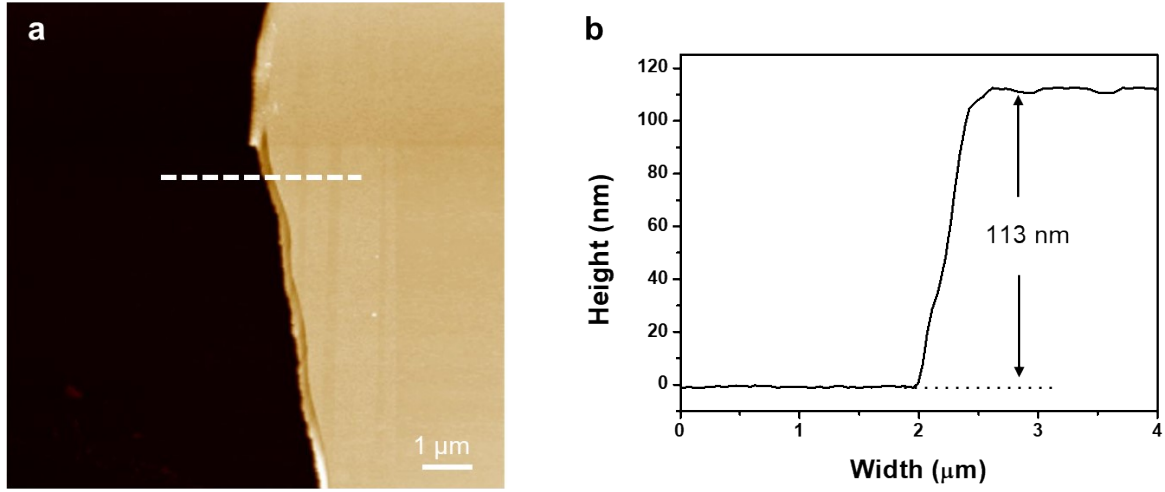

**Fig. S2** (a) AFM image of the silk film. (b) Height profile along the dotted line in (a).

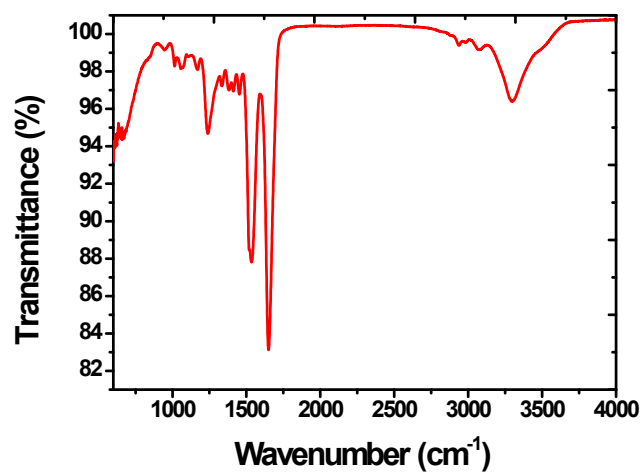

**Fig. S3** FTIR spectrum of silk fibroin.

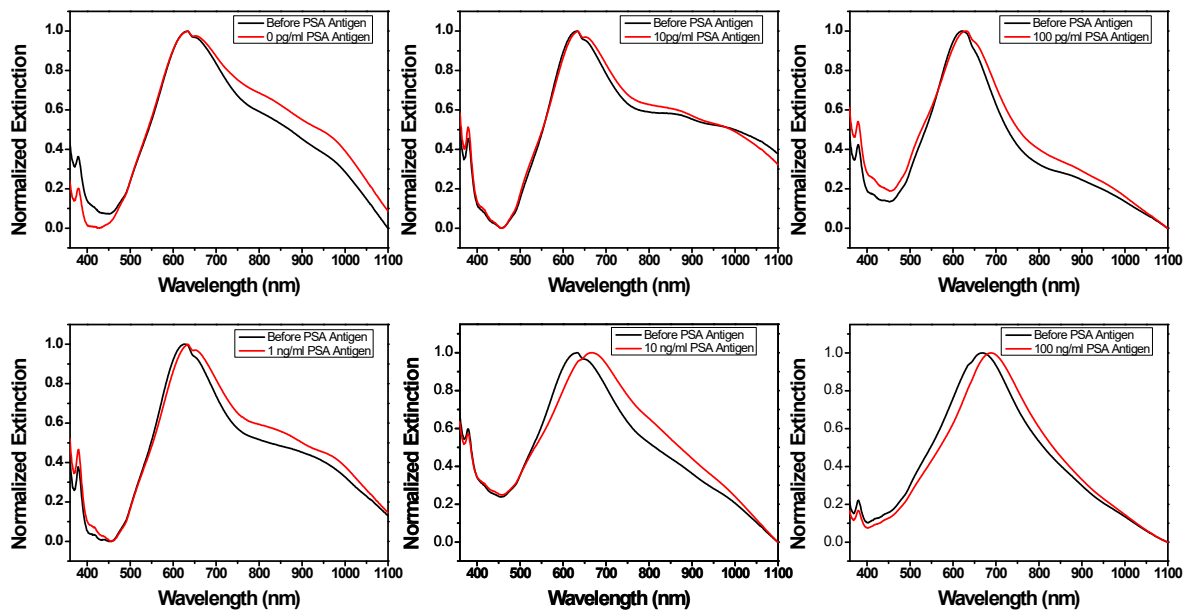

**Fig. S4** Representative UV-vis spectra of yolk-shell nanomaterials-PSA antibodies conjugate on glass substrates exposed to various concentrations of PSA.

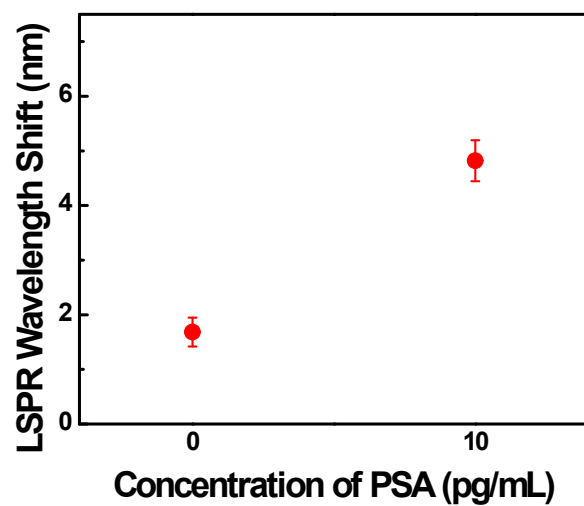

**Fig. S5** LSPR shift of yolk-shell nanomaterials-PSA antibodies conjugate on glass substrates exposed to the blank sample and PSA at the concentration of 10 pg/mL. n=3.

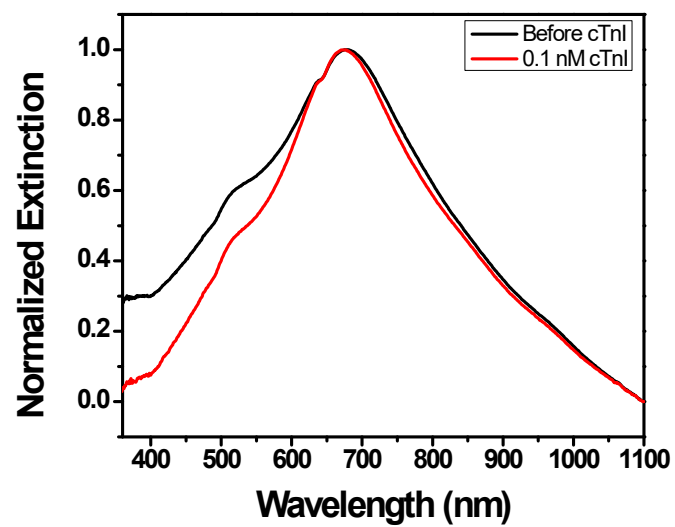

**Fig. S6** LSPR shift of yolk-shell nanomaterials-PSA antibodies conjugate on glass substrates exposed to the interfering protein.

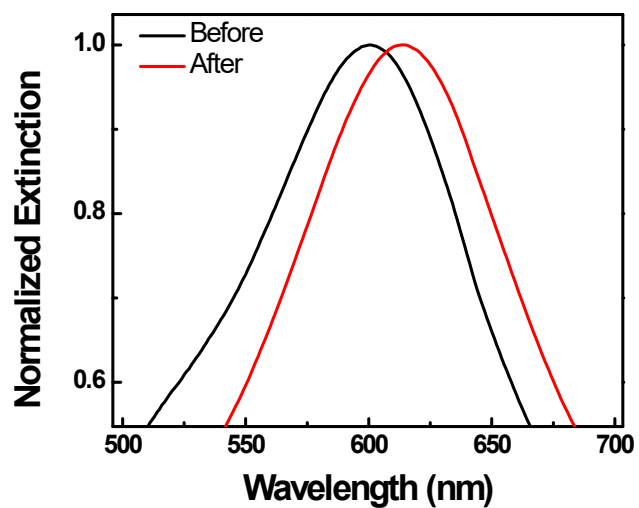

**Fig. S7** LSPR shift of yolk-shell nanomaterials-PSA antibodies conjugate on glass substrates exposed to a complex medium comprising PSA (100 ng/mL), cTnl (0.1 nM), and Hb (150 mg/mL).
